# Supplementary material for: Oligothiophene quinoids containing a benzo[c]thiophene unit for the stabilization of the quinoidal electronic structure
Source: Royal Society of Chemistry journal article supplement (doi:10.1039/c8tc01802b), 2018-01-01
Supplement: c8tc01802b1.pdf [file c8tc01802b1.pdf]

## Electronic Supplementary Information

### Oligothiophene quinoids containing benzo[*c*]thiophene unit for stabilization of quinoidal electronic structure

Keitaro Yamamoto,<sup>a)</sup> Yutaka Ie,<sup>\*a,b,e)</sup> Masashi Nitani,<sup>a)</sup> Norimitsu Tohnai,<sup>c)</sup> Fumitoshi Kakiuchi,<sup>b,d)</sup> Ke Zhang,<sup>e)</sup> Wojciech Pisula,<sup>e,f)</sup> Kamal Asadi,<sup>e)</sup> Paul W. M. Blom,<sup>e)</sup> and Yoshio Aso <sup>\*a)</sup>

<sup>a)</sup> *The Institute of Scientific and Industrial Research (ISIR), Osaka University, 8-1 Mihogaoka, Ibaraki, Osaka 567-0047, Japan*

<sup>b)</sup> *Japan Science and Technology (JST) Agency, ACT-C, 4-1-8 Honcho, Kawaguchi, Saitama, 332-0012, Japan.*

<sup>c)</sup> *Department of Materials and Life Science, Graduate School of Engineering, Osaka University, 2-1 Yamadaoka, Suita, Osaka 565-0871, Japan*

<sup>d)</sup> *Department of Chemistry, Faculty of Science and Technology, Keio University, 3-14-1 Hiyoshi, Kohoku-ku, Yokohama, Kanagawa 223-8522, Japan.*

<sup>e)</sup> *Max Planck Institute for Polymer Research, Ackermannweg 10, 55128 Mainz, Germany*

<sup>f)</sup> *Department of Molecular Physics, Faculty of Chemistry, Lodz University of Technology, Zeromskiego 116, 90-924 Lodz, Poland*

## Table of Contents

|                                |                |
|--------------------------------|----------------|
| <b>Supplementary Figures</b>   | <b>S2-S4</b>   |
| <b>General Information</b>     | <b>S5</b>      |
| <b>Synthesis</b>               | <b>S5-S10</b>  |
| <b>NMR Spectra</b>             | <b>S11-S13</b> |
| <b>OFET Device Fabrication</b> | <b>S14</b>     |
| <b>Computational Details</b>   | <b>S14-S20</b> |
| <b>References</b>              | <b>S20</b>     |

## Supplementary Figures

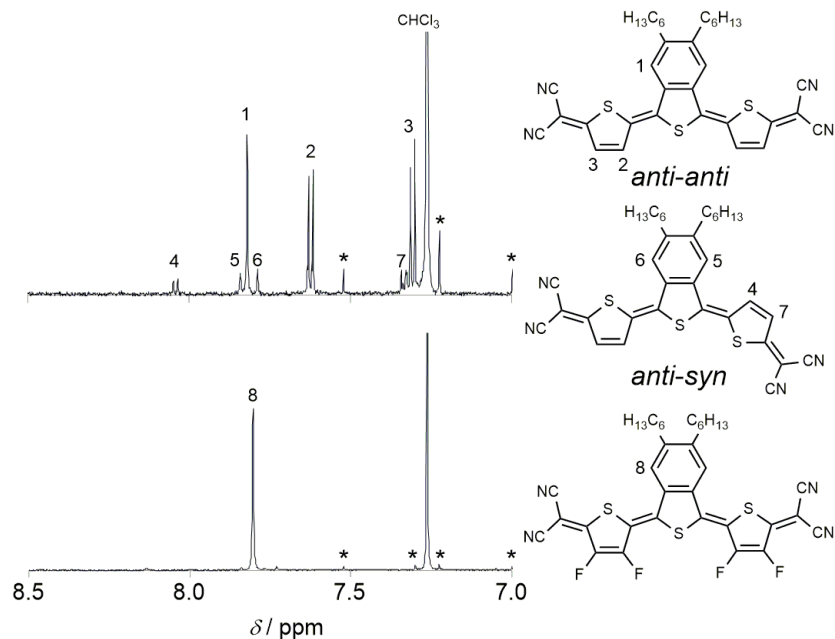

**Fig. S1** Magnified  $^1\text{H}$  NMR spectra of BTQ and BTQ-F at room temperature in  $\text{CDCl}_3$ .

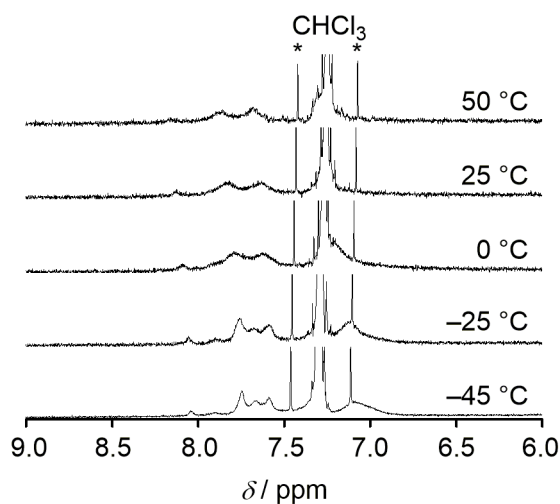

**Fig. S2** VT-NMR spectra of BTQ-6 in aromatic regions in  $\text{CDCl}_3$ . Signals pointed by asterisk are satellite peak of  $\text{CHCl}_3$ .

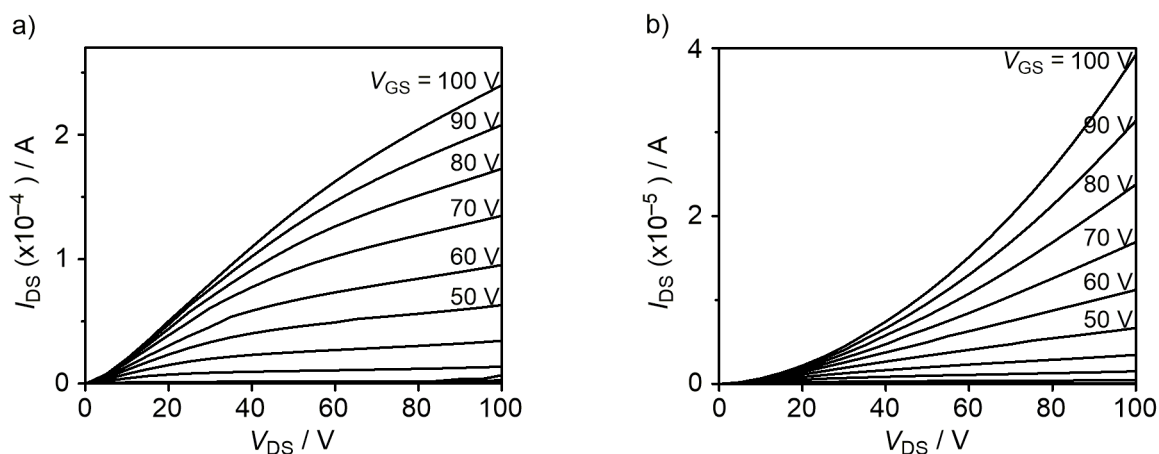

**Fig. S3** Output characteristics of the OFET using (a) BTQ and (b) BTQ-F at source-drain voltage of 100 V.  $I_{\text{DS}}$ , and  $V_{\text{DS}}$  denotes source-drain current and source-drain voltage, respectively.

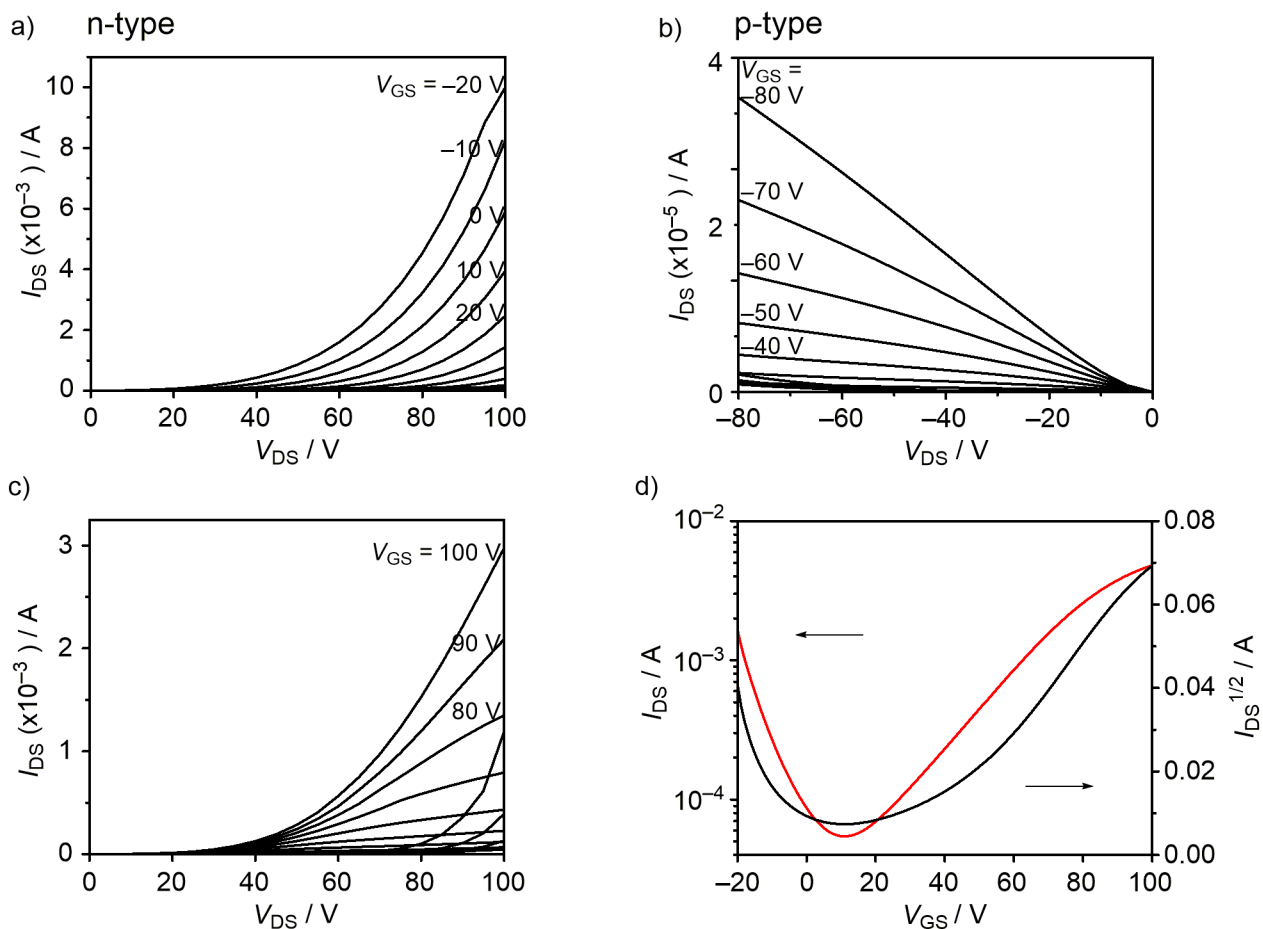

**Fig. S4** Output characteristics of (a) BTQ-6, (b) BTQ-6, and (c) TQ. (d) Transfer characteristics of OFETs using TQ.

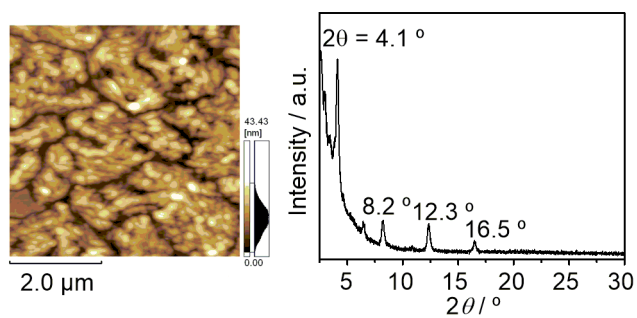

**Fig. S5** AFM images and XRD data of TQ.

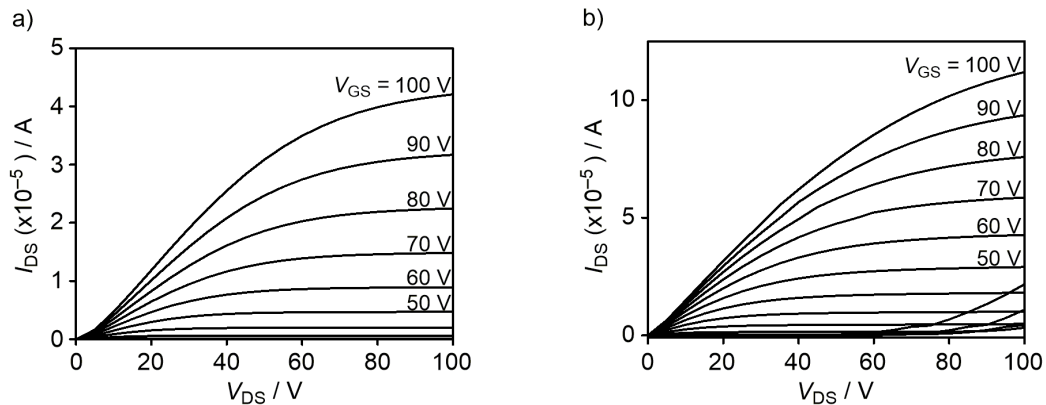

**Fig. S6** Output characteristics of the 1-hexadecanethiol-treated OFETs using (a) **BTQ** and (b) **TQ**.

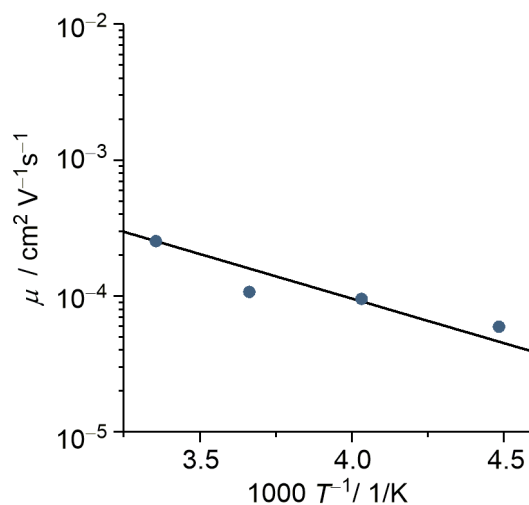

**Fig. S7** Temperature dependence of carrier mobility for **BTQ**. Black solid lines were fitted from the equation  $\mu = \mu_0 \exp(-E_a/kT)$ , where  $E_a$  is an activation energy,  $k$  is Boltzmann's constant, and  $\mu_0$  is the mobility at  $1000/T = 0$ .

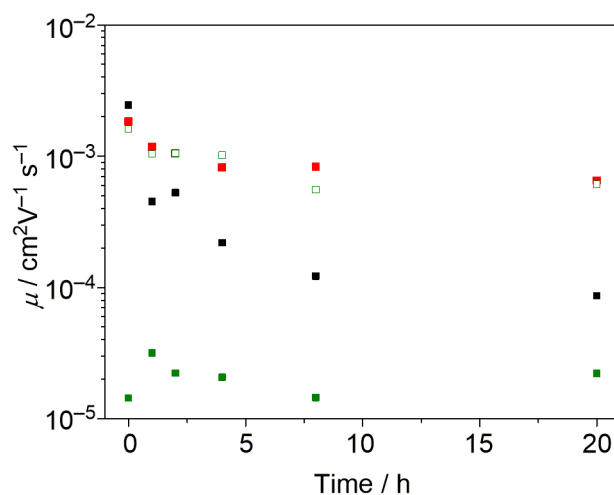

**Fig. S8** Plots of electron mobility against time for **BTQ** (red square), **TQ** (black square), and **BTQ-6** (green square). Hole mobility of **BTQ-6** is represented as empty green square.

## General Information

Column chromatography was performed on silica gel. KANTO Chemical silica gel 60N (40–50  $\mu\text{m}$ ). Thin-layer Chromatography (TLC) plates were visualized with UV light. Preparative gel-permeation chromatography (GPC) was performed on a Japan Analytical LC-918 equipped with JAI-GEL 1H/2H.  $^1\text{H}$  and  $^{13}\text{C}$  NMR spectra were recorded on a JEOL JNM-ECS400 or JEOL JNM-ECA600 spectrometer in  $\text{CDCl}_3$  with tetramethylsilane (TMS) as an internal standard.  $^{19}\text{F}$  NMR spectra were recorded on a JEOL JNM-ECA600 spectrometer in  $\text{CDCl}_3$ . Data are reported as follows: chemical shift in ppm ( $\delta$ ), multiplicity (s = singlet, d = doublet, t = triple, m = multiplet, br = broad), coupling constant (Hz), and integration. Mass spectra were obtained on a Shimadzu AXIMA-TOF. UV-vis spectra were recorded on a Shimadzu UV-3600 spectrophotometer. All spectra were obtained in spectrograde solvents. Cyclic voltammetry was carried out on a BAS CV-620C voltammetric analyzer using a platinum disk as the working electrode, platinum wire as the counter electrode, and  $\text{Ag}/\text{AgNO}_3$  as the reference electrode at a scan rate of  $100 \text{ mV s}^{-1}$ . Elemental analyses were performed on PerkinElmer LS-50B by the elemental analysis section of the Comprehensive Analysis Center (CAC) of ISIR, Osaka University. The surface structures of the deposited organic film were observed by atomic force microscopy (Shimadzu, SPM9600), and the film crystallinity was evaluated by an X-ray diffractometer (Rigaku, SmartLab). X-ray diffraction patterns were obtained using Bragg-Brentano geometry with  $\text{CuK}\alpha$  radiation as an X-ray source with an acceleration voltage of 45 kV and a beam current of 200 mA. The scanning mode was set to  $2\theta$ – $\theta$  scans between  $2^\circ$ – $30^\circ$  with scanning steps of  $0.01^\circ$ .

## Synthesis

Unless stated otherwise, all reagents were purchased from commercial sources and used without purification. Compounds **1** and 2-bromo-3,4-difluoro-5-trimethylsilyl-thiophene were prepared by the reported procedures.<sup>1,2</sup>

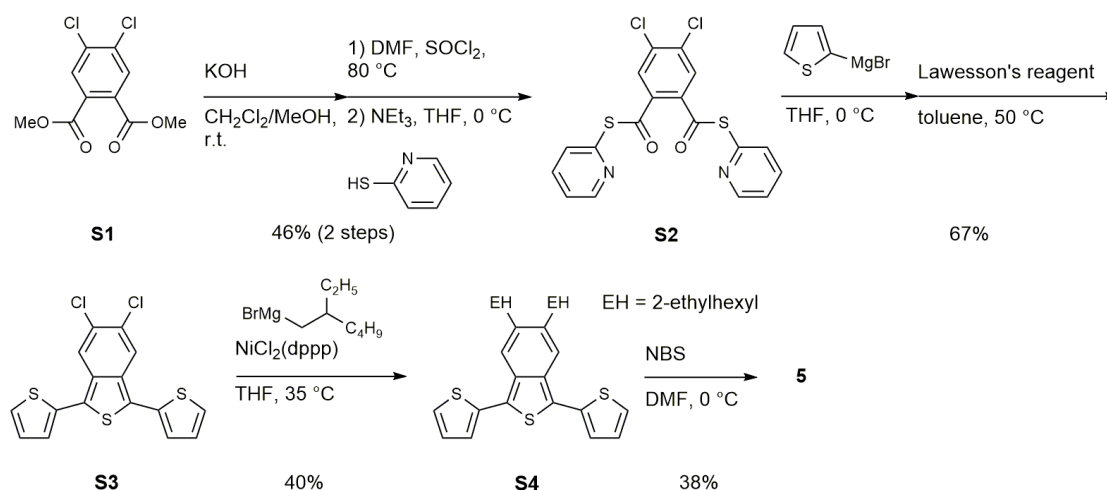

**Scheme S1.** Synthetic route of **5**.

*Synthesis of S2*: Compound **S1** was synthesized from **S1** with a yield of 46% by following the procedure used for the preparation of **2**. Pale yellow solid; <sup>1</sup>H NMR (400 MHz, CDCl<sub>3</sub>, TMS): δ 7.31-7.35 (m, 2H), 7.73-7.80 (m, 4H), 7.96 (s, 2H), 8.64 (m, 2H). This compound was used for next step without further purification.

*Synthesis of S3*: Compound **S2** (6.9 g, 16.4 mmol) was placed in a two-necked-bottomed flask and dissolved in THF (112 mL). 2-Thienyl magnesium bromide (32.8 mmol, 0.5 M in THF) was added slowly to the solution at 0 °C. The reaction mixture was stirred for 30 min. and then quenched by addition of 10% HCl aq.. The resultant mixture was extracted with CHCl<sub>3</sub>, and the combined organic layer was washed with 5% NaOH aq., NaHCO<sub>3</sub> aq., and water. After drying over with MgSO<sub>4</sub>, the solvent was removed under reduced pressure to give **D** as a pale yellow solid. <sup>1</sup>H NMR (400 MHz, CDCl<sub>3</sub>, TMS): δ 7.11 (dd, *J* = 5.0, 3.7 Hz, 2H), 7.47 (dd, *J* = 3.7, 0.9 Hz, 2H), 7.71 (dd, *J* = 5.0, 0.9 Hz, 2H), 7.82 (s, 2H); <sup>13</sup>C NMR (100 MHz, CDCl<sub>3</sub>, TMS): δ 128.3, 131.0, 135.2, 135.3, 135.8, 138.7, 143.2, 185.7.

Lawesson's reagent (9.4 g, 23.4 mmol) was added to a solution of **D** in toluene (260 mL) and stirred at 50 °C. After stirring for 1 h, the solvent was removed under reduced pressure and purified by column chromatography on silica gel (CHCl<sub>3</sub>). Then obtained solid was recrystallized from CHCl<sub>3</sub>/hexane to give **S3** (4.0 g, 67%) as a red solid. <sup>1</sup>H NMR (400 MHz, CDCl<sub>3</sub>, TMS): δ 7.16 (dd, *J* = 5.0, 3.7 Hz, 2H), 7.32 (dd, *J* = 3.7, 0.9 Hz, 2H), 7.42 (dd, *J* = 5.0, 0.9 Hz, 2H), 8.03 (s, 2H); <sup>13</sup>C NMR (100 MHz, CDCl<sub>3</sub>, TMS): δ 122.2, 126.6, 126.7, 127.1, 128.5, 130.3, 133.6, 134.7; HRMS (APCI) *m/z* 366.9232 ([M+H]<sup>+</sup>) ([M+H]<sup>+</sup>, Calcd 366.9238).

*Synthesis of S4*: Compound **S3** (1.13 g, 3.08 mmol) and NiCl<sub>2</sub>(dppp) (85 mg, 0.157 mmol) were placed in a two-necked-bottomed flask and dissolved in THF (10.8 mL). (2-Ethylhexyl)magnesium bromide (9.38 mmol, 1.0 M in Et<sub>2</sub>O) was added slowly to the solution at 0 °C. The reaction mixture was stirred for 1 h at 0 °C, 11 h at 35 °C, and then quenched by addition of water. The resultant mixture was extracted with EtOAc, and the combined organic layer was washed with water. After drying over with MgSO<sub>4</sub>, the solvent was removed under reduced pressure and purified by column chromatography on silica gel (hexane), followed by purification with preparative GPC (CHCl<sub>3</sub>) to give **S4** (660 mg, 40%) as a red oil. <sup>1</sup>H NMR (400 MHz, CDCl<sub>3</sub>, TMS): δ 0.85-0.93 (m, 12H), 1.22-1.42 (m, 16H), 1.63 (m, 2H), 2.59 (m, 4H), 7.14 (d, *J* = 5.0, 3.7 Hz, 2H), 7.32 (dd, *J* = 3.7, 1.4 Hz, 2H), 7.35 (dd, *J* = 5.0, 1.4 Hz, 2H), 7.66 (s, 2H); <sup>13</sup>C NMR (100 MHz, CDCl<sub>3</sub>, TMS): δ 10.8, 14.2, 23.2, 25.5, 28.8, 32.5, 37.7, 39.7, 121.0, 124.6, 124.9, 127.8, 134.6, 136.2, 138.4; HRMS (APCI) *m/z* 523.2512 ([M+H]<sup>+</sup>) ([M+H]<sup>+</sup>, Calcd 523.2521).

*Synthesis of 5*: NBS (224 mg, 1.26 mmol) was added in two portions to a solution of **S4** (660 mg, 1.26 mmol) in DMF (35 mL) at 0 °C. After stirring for 4 h at 0 °C, the reaction was quenched by addition of water. The combined organic was extracted with EtOAc and washed with water. After drying over with MgSO<sub>4</sub>, the solvent was removed under reduced pressure and purified by column chromatography on silica gel (hexane) to give **5** (290 mg, 38%) as a red oil. <sup>1</sup>H NMR (400 MHz, CDCl<sub>3</sub>, TMS): δ 0.82-0.93 (m, 12H), 1.22-1.42 (m, 16H), 1.62 (m, 2H), 2.59 (m, 4H), 7.04 (d, *J* = 4.4 Hz, 1H), 7.08 (d, *J* = 4.4 Hz, 1H), 7.14 (dd, *J* = 5.0, 3.8 Hz, 1H), 7.32 (dd, *J* = 3.8, 1.0 Hz, 1H), 7.36 (dd, *J* = 5.0, 1.0 Hz, 1H), 7.56 (s, 1H), 7.66 (s, 1H); <sup>13</sup>C NMR (100 MHz, CDCl<sub>3</sub>, TMS): δ 10.9, 14.2, 23.2, 25.6, 28.8, 32.5, 37.7, 40.0, 111.4, 120.7, 121.1, 123.3, 125.2, 125.3, 125.4, 127.8,

130.6, 134.5, 134.8, 136.0, 137.8, 138.6, 138.9; HRMS (APCI)  $m/z$  601.1626 ( $[M+H]^+$ ) ( $[M+H]^+$ , Calcd 601.1627).

**Synthesis of 2:** Compound **1** (1.44 g, 4.41 mmol) was placed in a round-bottom flask and dissolved in methanol (4.8 mL). Potassium hydroxide (988 mg, 17.6 mmol) was added to the mixture at room temperature. After stirring for 5 min, water was poured into the reaction mixture. The aqueous layer was washed with ether to remove unreacted ester compounds and then acidified with 6 *N* hydrochloric acid (HCl). The precipitate was extracted with ether and dried over  $MgSO_4$ . The solvent was removed under reduced pressure to give dicarboxylic acid **A** as a white solid (1.3 g).  $^1H$  NMR (400 MHz,  $DMSO-d_6$ ):  $\delta$  0.86 (t,  $J = 7.2$  Hz, 6H), 1.21-1.39 (m, 12H), 1.45-1.57 (m, 4H), 2.58-2.66 (m, 4H), 7.43 (s, 2H), 12.5-13.2 (br, 2H). This compound was used for next step without further purification. **A** (550 mg, 1.64 mmol) was placed in a round-bottom flask. Thionyl chloride (10 mL) and DMF as a catalyst was added to the flask, and the reaction mixture was reflux for overnight. After removal of thionyl chloride and DMF under reduced pressure, the residue was resolved in THF (5.8 mL). Then, this solution was added to a solution of triethylamine (0.55 mL) and 2-mercaptopyridine (362 mg, 3.28 mmol) in THF (7.5 mL) at 0 °C. After vigorously stirring for 10 min., the reaction was quenched by addition of 2% HCl aq.. The resultant mixture was extracted with  $CHCl_3$ . The combined organic layer was washed with 10% sodium hydroxide (NaOH) aq., and water. After drying over with  $MgSO_4$ , the solvent was removed under reduced pressure. The residue was purified by column chromatography on silica gel (hexane:EtOAc = 5:3) to give **2** (810 mg, 84%, 2 steps) as a pale yellow solid.  $^1H$  NMR (400 MHz,  $CDCl_3$ , TMS):  $\delta$  0.91 (t,  $J = 7.0$  Hz, 6H), 1.30-1.46 (m, 12H), 1.55-1.65 (m, 4H), 2.66-2.72 (m, 4H), 7.28-7.32 (m, 2H), 7.65 (s, 2H), 7.74-7.82 (m, 4H), 8.62-8.65 (m, 2H);  $^{13}C$  NMR (100 MHz,  $CDCl_3$ , TMS):  $\delta$  13.4, 21.8, 28.6, 30.0, 30.9, 31.9, 122.9, 128.8, 129.7, 133.6, 136.5, 144.7, 149.6, 150.9, 189.4; HRMS (ESI)  $m/z$  543.2107 ( $[M+Na]^+$ ) ( $[M+Na]^+$ , Calcd 543.2110).

**Synthesis of 3a:** Compound **2** (810 mg, 1.56 mmol) was placed in a two-necked-bottomed flask and resolved in THF (11 mL). 2-Thienyl magnesium bromide (3.12 mmol, 0.5 M in THF) was added slowly to the solution at 0 °C. The reaction mixture was stirred for 30 min. and then quenched by addition of 10% HCl aq.. The resultant mixture was extracted with  $CHCl_3$ , and the combined organic layer was washed with 10% NaOH aq.,  $NaHCO_3$  aq., and water. After drying over with  $MgSO_4$ , the solvent was removed under reduced pressure. The residue was purified by column chromatography on silica gel (hexane:EtOAc = 8:1) to give **3a** (660 mg, 90%) as a pale yellow solid.  $^1H$  NMR (400 MHz,  $CDCl_3$ , TMS):  $\delta$  0.90 (t,  $J = 7.0$  Hz, 6H), 1.28-1.46 (m, 12H), 1.59-1.67 (m, 4H), 2.68-2.74 (m, 4H), 7.06 (dd,  $J = 5.0$  and 3.6 Hz, 2H), 7.46 (dd,  $J = 3.6$  and 1.2 Hz, 2H), 7.51 (s, 2H), 7.64 (dd,  $J = 5.0$  and 1.2 Hz, 2H);  $^{13}C$  NMR (100 MHz,  $CDCl_3$ , TMS):  $\delta$  14.1, 22.6, 29.4, 30.9, 31.7, 32.7, 127.9, 130.2, 134.5, 134.8, 136.9, 143.8, 144.5, 188.5; MS MALDI-TOF (1,8,9-trihydroxyanthracene matrix)  $m/z$  466.03 ( $M^+$ , Calcd 465.93); Anal. Calcd for  $C_{28}H_{34}O_2S_2$ : C 72.06, H 7.34; found: C 71.86, H 7.34.

**Synthesis of 3b:** Compound **2** (433 mg, 0.831 mmol) was placed in a two-necked-bottomed flask and dissolved in THF (3.5 mL). The Grignard solution (1.83 mmol, 0.5 M in THF), which was generated in situ by refluxing of 2-bromo-3,4-difluoro-5-trimethylsilylthiophene and magnesium for 30 min., was added slowly to the solution at

0 °C. The reaction mixture was stirred for 2 h and then quenched by addition of 10% HCl aq.. Purification was conducted by following the same procedure as **3a** to give **3b** (420 mg 74%) as a pale yellow oil. <sup>1</sup>H NMR (400 MHz, CDCl<sub>3</sub>, TMS): δ 0.35(s, 18H), 0.90 (t, *J* = 6.8 Hz, 6H), 1.30-1.42 (m, 12H), 1.58-1.64 (m, 4H); <sup>19</sup>F NMR (565 MHz, CDCl<sub>3</sub>): δ -125.7, -122.9; <sup>13</sup>C NMR (150 MHz, CDCl<sub>3</sub>, TMS): δ -0.9, 14.4, 22.9, 29.7, 31.1, 32.0, 33.0, 125.2, 125.6, 130.3, 136.4, 144.8, 146.4, 149.7, 185.5; MS MALDI-TOF (1,8,9-trihydroxyanthracene matrix) *m/z* 681.88 (M<sup>+</sup>, Calcd 682.24); Anal. Calcd for C<sub>34</sub>H<sub>46</sub>F<sub>4</sub>O<sub>2</sub>S<sub>2</sub>Si<sub>2</sub>: C 59.79, H 6.79; found: C 59.56, H 6.64.

*Synthesis of 4a*: Davy's reagent (623 mg, 2.19 mmol) was added to a solution of **3a** (930 mg, 1.99 mmol) in toluene (61 mL) and stirred at 50 °C. After stirring for 1 h, the solvent was removed under vacuum and ethanol (61 mL) was added. This solution was stirred at 50 °C for 30 min. The solvent was removed under reduced pressure and purified by column chromatography on silica gel (hexane) to give the intermediate **B** (810 mg) as a red solid. NBS (619 mg, 1.74 mmol) was added in four portions to a solution of the **B** (810 mg) in DMF (28 mL) at 0 °C. After stirring for 2 h at 0 °C, the reaction was quenched by addition of water. The combined organic was extracted with EtOAc and washed with water. The solvent was removed under reduced pressure and purified by column chromatography on silica gel (hexane:CH<sub>2</sub>Cl<sub>2</sub> = 1:1), followed by purification with preparative GPC (CHCl<sub>3</sub>) to give **4a** (760 mg, 61%) as a red solid. <sup>1</sup>H NMR (400 MHz, CDCl<sub>3</sub>, TMS): δ 0.91 (t, *J* = 6.8 Hz, 6H), 1.29-1.49 (m, 12H), 1.60-1.68 (m, 4H), 2.62-2.68 (m, 4H), 7.05 (d, *J* = 2.0 Hz, 2H), 7.09 (d, *J* = 2.0 Hz, 2H), 7.60 (s, 2H); <sup>13</sup>C NMR (100 MHz, CDCl<sub>3</sub>, TMS): δ 14.1, 22.7, 29.4, 30.8, 31.8, 33.1, 111.8, 119.4, 124.1, 125.4, 130.6, 134.9, 137.4, 140.0; MS MALDI-TOF (1,8,9-trihydroxyanthracene matrix) *m/z* 623.55 (M<sup>+</sup>, Calcd 624.00); Anal. Calcd for C<sub>28</sub>H<sub>32</sub>Br<sub>2</sub>S<sub>3</sub>: C 53.85, H 5.16; found: C 53.76, H 5.29.

*Synthesis of 4b*: Compound **4b** was synthesized from **3b** with a yield of 46% by following the procedure used for the preparation of **4a**. Red solid; <sup>1</sup>H NMR (400 MHz, CDCl<sub>3</sub>, TMS): δ 0.91 (t, *J* = 6.8 Hz, 6H), 1.31-1.50 (m, 12H), 1.59-1.68 (m, 4H), 2.67 (t, *J* = 7.6 Hz, 4H), 7.50 (s, 2H); <sup>19</sup>F NMR (565 MHz, CDCl<sub>3</sub>): δ -132.3, -131.4; <sup>13</sup>C NMR (150 MHz, CDCl<sub>3</sub>, TMS): δ 14.1, 22.7, 29.3, 30.7, 31.8, 33.1, 90.9, 114.2, 119.3, 120.2, 135.7, 140.6, 140.7, 144.9; MS MALDI-TOF (1,8,9-trihydroxyanthracene matrix) *m/z* 695.02 (M<sup>+</sup>, Calcd 695.96); Calcd for C<sub>28</sub>H<sub>28</sub>Br<sub>2</sub>F<sub>4</sub>S<sub>3</sub>: C 48.28, H 4.05; found: C 48.22, H 4.23.

*Synthesis of BTQ*: Sodium hydride (60% in oil) (20 mg, 0.51 mmol) was added to a suspension of malononitrile (17 mg, 0.25 mmol) in anhydrous 1,4-dioxane (3.0 mL) under nitrogen atmosphere and stirred for 10 min at room temperature. To this mixture was added **4a** (66 mg, 0.11 mmol) and Pd(PPh<sub>3</sub>)<sub>4</sub> (12 mg, 0.011 mmol). After stirring for 4 h at reflux, the reaction was quenched by adding 1.0 M HCl aq., and then DDQ (36 mg, 0.16 mmol) was added to the mixture. After stirring for 30 min. at room temperature, the resulting mixture was extracted with CH<sub>2</sub>Cl<sub>2</sub>. The combined organic was washed with water and dried over MgSO<sub>4</sub>. The solvent was removed under reduced pressure, and the residue was purified by column chromatography on silica gel (hexane:CH<sub>2</sub>Cl<sub>2</sub> = 5:1) to give **BTQ** (25 mg, 40%) as a blue solid. <sup>1</sup>H NMR (400 MHz, CDCl<sub>3</sub>, TMS): δ 0.92 (t, *J* = 7.0 Hz, 6H), 1.32-1.52 (m, 12H), 1.62-1.71 (m, 4H), 2.80-2.86 (m, 4H), 7.31 (d, *J* = 2.8 Hz, 2H), 7.62 (d, *J* = 2.8 Hz, 2H), 7.82 (s, 2H);



$^{13}\text{C}$  NMR (150 MHz,  $\text{CDCl}_3$ , TMS):  $\delta$  14.1, 22.6, 29.3, 31.1, 31.6, 33.5, 67.9, 113.1, 114.0, 126.6, 129.8, 129.9, 137.1, 140.4, 141.7, 147.0, 172.6; MS MALDI-TOF (1,8,9-trihydroxyanthracene matrix)  $m/z$  591.98 ( $\text{M}^+$ , Calcd 592.18); Calcd for  $\text{C}_{34}\text{H}_{32}\text{N}_4\text{S}_3$ : C 68.88, H 5.44, N 9.45; found: C 68.56, H 5.45, N 9.38.

*Synthesis of BTQ-F*: Compound **BTQ-F** was synthesized from **4b** with a yield of 30% by following the procedure used for the preparation of **BTQ**. Blue solid;  $^1\text{H}$  NMR (400 MHz,  $\text{CDCl}_3$ , TMS):  $\delta$  0.92 (t,  $J$  = 6.8 Hz, 6H), 1.30–1.52 (m, 12H), 1.63–1.72 (m, 4H), 2.84 (t,  $J$  = 7.6 Hz, 4H), 7.80 (s, 2H);  $^{19}\text{F}$  NMR (565 MHz,  $\text{CDCl}_3$ ):  $\delta$  –135.8, –111.8;  $^{13}\text{C}$  NMR (150 MHz,  $\text{CDCl}_3$ , TMS):  $\delta$  14.1, 22.6, 29.2, 30.7, 31.6, 33.3, 67.7, 111.2, 111.3, 112.6, 112.9, 126.8, 136.6, 140.5, 142.4, 147.6, 152.0; MS MALDI-TOF (1,8,9-trihydroxyanthracene matrix)  $m/z$  663.84 ( $\text{M}^+$ , Calcd 664.14); HRMS (APCI)  $m/z$  665.1479 ( $[\text{M}+\text{H}]^+$ ) ( $[\text{M}+\text{H}]^+$ , Calcd 665.1485).

*Synthesis of 6: 5* (110 mg, 0.183 mmol), bis(pinacolato)diboron (24.7 mg, 0.0967 mmol),  $\text{PdCl}_2(\text{dppf})\cdot\text{CH}_2\text{Cl}_2$  (15.0 mg, 0.0183 mmol), potassium fluoride (52.2 mg, 0.894 mmol), and toluene/methanol (2.5/2.5 mL) were placed in a microwave proof walled glass vial equipped with a snap cap. The glass vial was purged nitrogen, securely sealed, and heated in a microwave reactor with keeping a temperature at 70 °C for 15 min. The solvent was removed under reduced pressure and purified by column chromatography on silica gel (hexane: $\text{CHCl}_3$  = 1:1) to give **C** (87 mg, 91%) as a violet solid.  $^1\text{H}$  NMR (400 MHz,  $\text{CDCl}_3$ , TMS):  $\delta$  0.86–0.96 (m, 24H), 1.22–1.46 (m, 32H), 1.60–1.70 (m, 4H), 2.54–2.70 (m, 8H), 7.15 (dd,  $J$  = 5.0, 3.7 Hz, 2H), 7.24 (d,  $J$  = 4.0 Hz, 2H), 7.27 (d,  $J$  = 4.0 Hz, 2H), 7.34 (dd,  $J$  = 3.7, 0.9 Hz, 2H), 7.37 (dd,  $J$  = 5.0, 0.9 Hz, 2H), 7.68 (s, 2H), 7.71 (s, 2H). NBS (39 mg, 0.220 mmol) was added in two portions to a solution of **C** (115 mg, 0.110 mmol) in THF (14 mL) at 0 °C. After stirring for 2 h at room temperature, the reaction was quenched by addition of water. The resulting mixture was extracted with EtOAc. The organic layer was washed with water and dried over  $\text{MgSO}_4$ . The solvent was removed under reduced pressure and purified by column chromatography on silica gel ( $\text{CHCl}_3$ ), followed by purification with preparative GPC ( $\text{CHCl}_3$ ) to give **6** (111 mg, 84%) as a violet solid.  $^1\text{H}$  NMR (400 MHz,  $\text{CDCl}_3$ , TMS):  $\delta$  0.85–0.96 (m, 24H), 1.24–1.46 (m, 32H), 1.59–1.69 (m, 4H), 2.54–2.68 (m, 8H), 7.06 (d,  $J$  = 4.1 Hz, 2H), 7.09 (d,  $J$  = 4.1 Hz, 2H), 7.24 (d,  $J$  = 3.7 Hz, 2H), 7.27 (d,  $J$  = 3.7 Hz, 2H), 7.56 (s, 2H), 7.02 (s, 2H);  $^{13}\text{C}$  NMR (100 MHz,  $\text{CDCl}_3$ , TMS):  $\delta$  10.9, 14.2, 23.2, 25.5, 28.8, 32.5, 37.7, 39.8, 111.6, 120.8, 121.2, 123.6, 124.3, 125.1, 125.7, 130.6, 134.5, 134.9, 135.1, 136.5, 137.6, 138.9, 139.1; HRMS (APCI)  $m/z$  1201.2991 ( $[\text{M}+\text{H}]^+$ ) ( $[\text{M}+\text{H}]^+$ , Calcd 1201.3003).

*Synthesis of BTQ-6*: Sodium hydride (60% in oil) (15 mg, 0.37 mmol) was added to a suspension of malononitrile (13 mg, 0.19 mmol) in anhydrous THF (2.2 mL) under nitrogen atmosphere and stirred for 10 min. at room temperature. To this mixture was added compound **6** (92 mg, 0.077 mmol) and  $\text{Pd}(\text{PPh}_3)_4$  (8.8 mg, 0.0077 mmol). After stirring at reflux temperature for 7 h, the reaction was quenched by adding 1.0 M HCl aq., and then DDQ (17 mg, 0.077 mmol) was added to the mixture. After stirring at room temperature for 30 min., the resulting mixture was extracted with  $\text{CHCl}_3$ . The combined organic was washed with water and dried over  $\text{MgSO}_4$ . The solvent was removed under reduced pressure, and the residue was purified by column chromatography on silica gel (hexane: $\text{CH}_2\text{Cl}_2$  = 5:1), followed by purification with preparative GPC ( $\text{CHCl}_3$ ) to give **BTQ-6** (8 mg, 9%) as

a black solid.  $^1\text{H}$  NMR (400 MHz,  $\text{CDCl}_3$ , TMS):  $\delta$  0.78-1.04 (m, 24H), 1.14-1.48 (br, 32H), 1.60-1.74 (br, 4H), 2.62-2.84 (br, 8H). Proton signals of aromatic region were observed as broad signals; HRMS (APCI)  $m/z$  1169.4767 ( $[\text{M}+\text{H}]^+$ ) ( $[\text{M}+\text{H}]^+$ , Calcd 1169.4780).

## NMR Spectra

$^1\text{H}$  NMR (400 MHz) and  $^{13}\text{C}$  NMR (150 MHz) spectra of **BTQ** in  $\text{CDCl}_3$ .

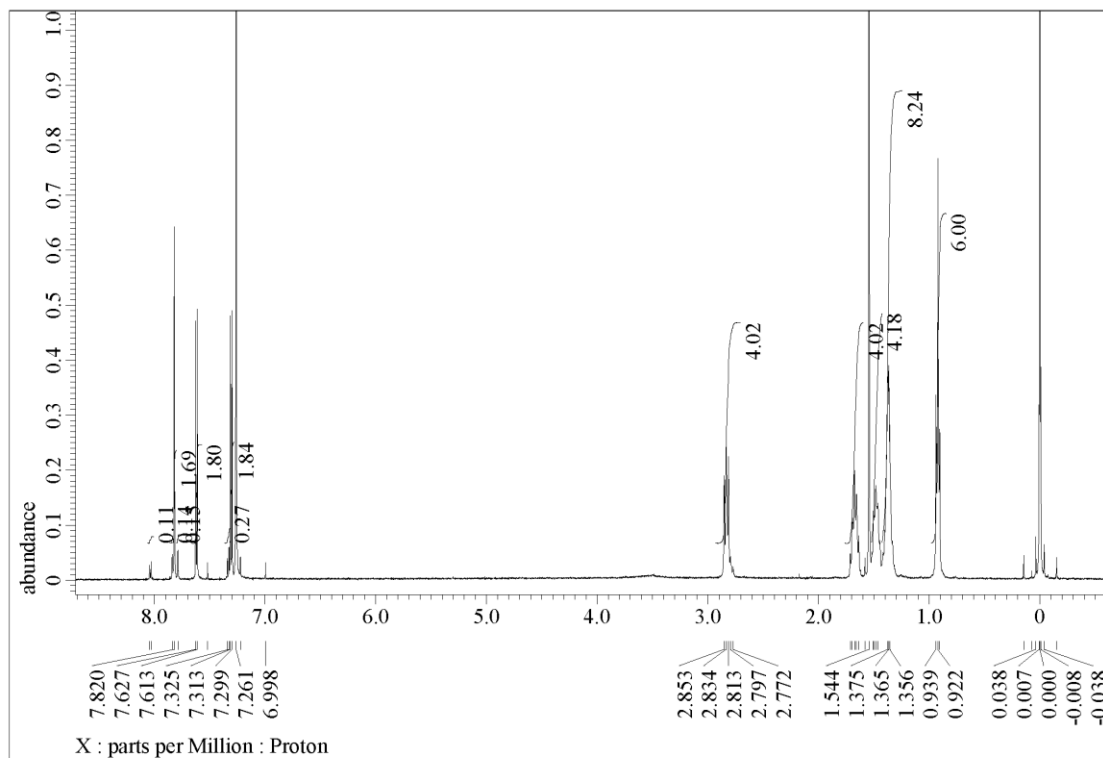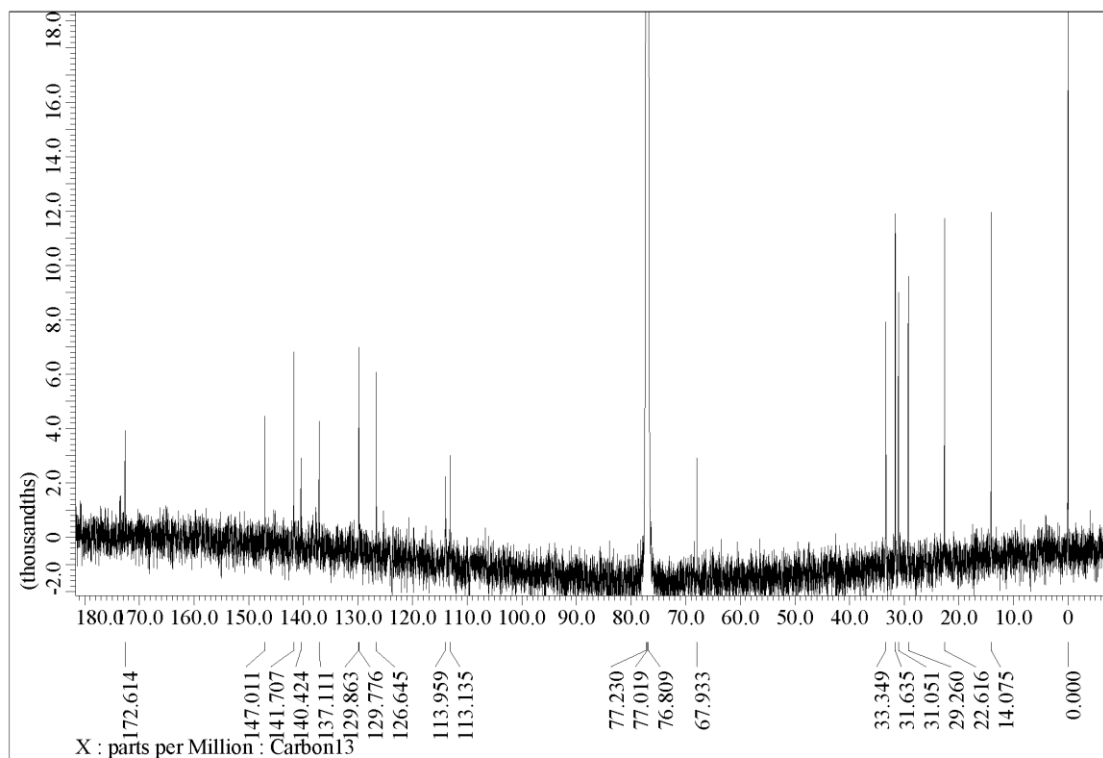

$^1\text{H}$  NMR (400 MHz) and  $^{13}\text{C}$  NMR (150 MHz) spectra of **BTQ-F** in  $\text{CDCl}_3$ .

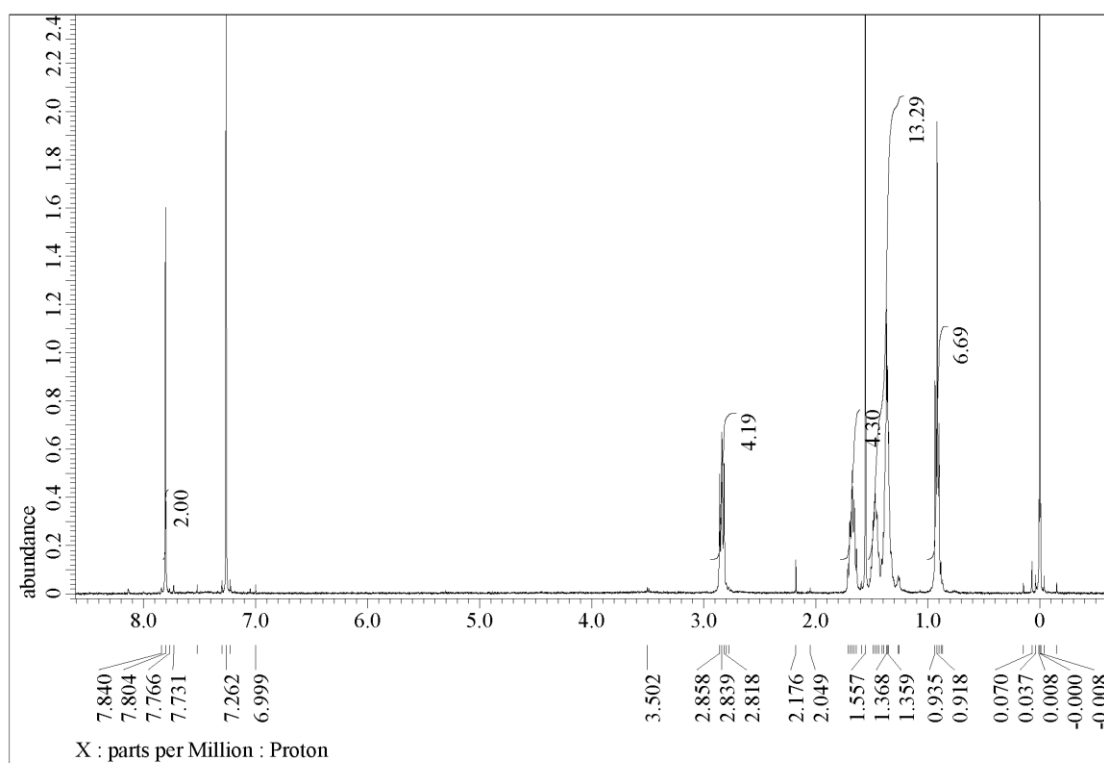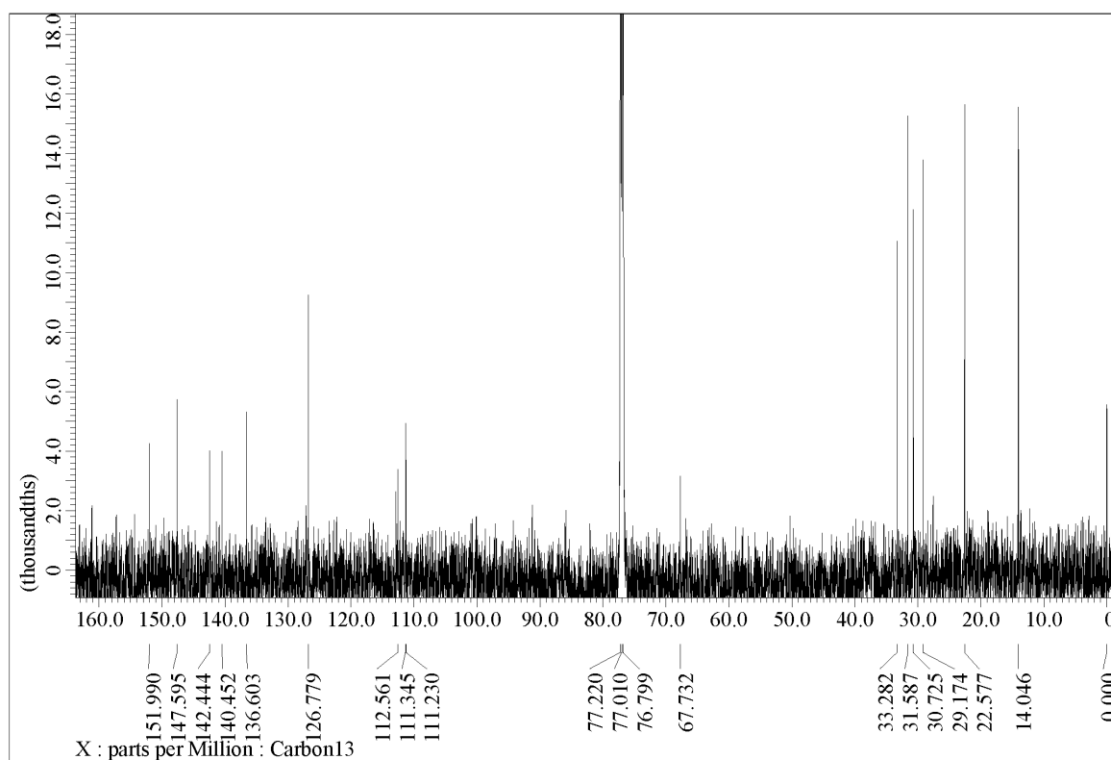

$^1\text{H}$  NMR (400 MHz) spectrum of **BTQ-6** in  $\text{CDCl}_3$ .

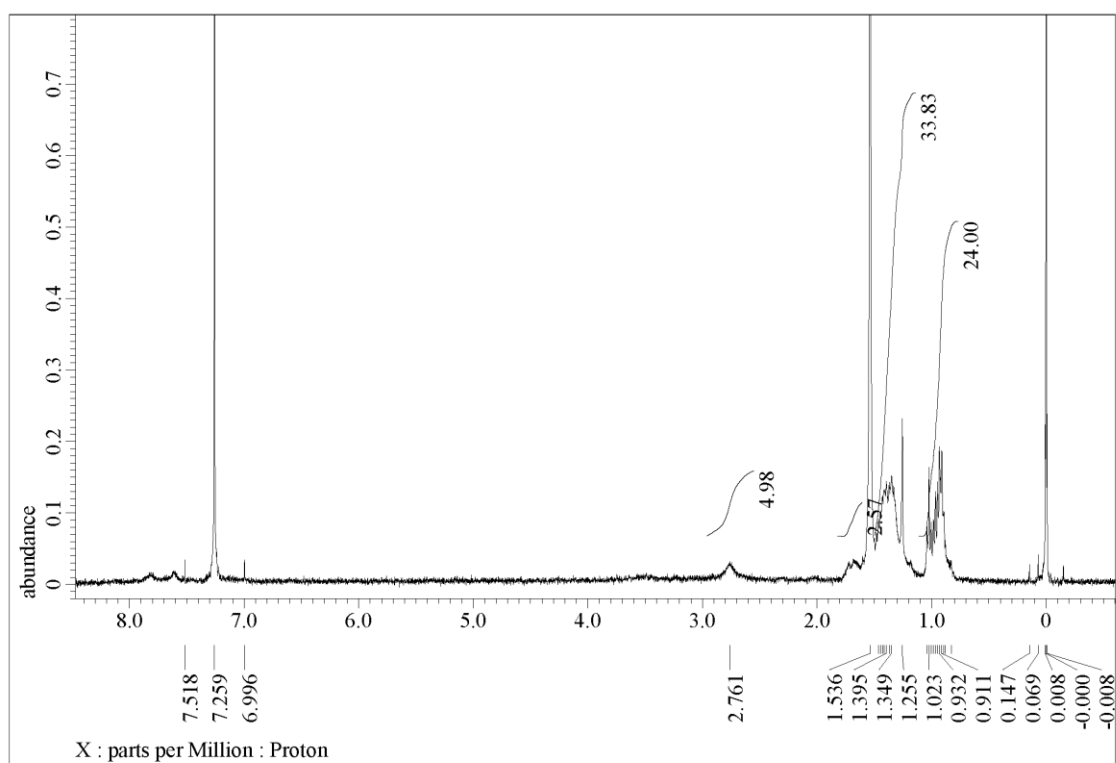

## OFET Device Fabrication

The field-effect electron mobility was measured using bottom-gate bottom-contact OFET devices. The p-doped silicon substrate functions as the gate electrode. A thermally grown silicon oxide (SiO<sub>2</sub>) dielectric layer on the gate substrate has 300 nm thick and a capacitance of 10.0 nF cm<sup>-2</sup>. Interdigital source and drain electrodes were constructed with gold (30 nm) that were formed on the SiO<sub>2</sub> layer. The channel width (*W*) and channel length (*L*) are 38 mm and 5 μm, respectively. The silicon oxide surface was first washed with toluene, acetone, purified water and 2-propanol. It was then activated by ozone treatment and pretreated with ODTS or HMDS. The semiconducting layer was fabricated by spin coating from 0.3 wt% chloroform solution at 1000 rpm for 1 min onto the substrate in air for **BTQ**, **BTQ-F** and **TQ**, 0.1 wt% chloroform solution at 1000 rpm for 1 min onto the substrate in air for **BTQ-6**, followed by annealing for 90 min at various temperatures under a vacuum condition (10<sup>-3</sup> Pa). The characteristics of the OFETs were measured at room temperature under a pressure of 10<sup>-3</sup> Pa by using a KEITHLEY 4200 semiconductor parameter analyzer. The  $\mu_e$  was calculated in the saturated region by the following equation.

$$I_{DS} = \frac{W}{2L} C_i \mu (V_{GS} - V_{th})^2$$

Current on/off ratio was determined from the  $I_D$  sat  $V_{GS} = 0$  V ( $I_{off}$ ) and  $V_{GS} = 100$  V ( $I_{on}$ ).

## Computational Details

All calculations were conducted using Gaussian 09 program. The geometry was optimized with the restricted Becke Hybrid (B3LYP) at 6-31 G(d,p) level.

### TD-DFT Calculation

#### BTQ(Me)

Excited State 1: Singlet-A 2.30 eV 538 nm  $f = 1.84$   $\langle S^2 \rangle = 0.000$   
HOMO-1 > LUMO+1 0.11515  
HOMO > LUMO 0.69738

#### BTQ-F(Me)

Excited State 1: Singlet-A 2.30 eV 538 nm  $f = 2.01$   $\langle S^2 \rangle = 0.000$   
HOMO-1 > LUMO+1 0.10961  
HOMO > LUMO 0.69954

#### TQ(Me)

Excited State 1: Singlet-A 2.11 eV 589 nm  $f = 1.98$   $\langle S^2 \rangle = 0.000$   
HOMO > LUMO 0.70613  
HOMO < LUMO 0.11819

Optimized structure of **BTQ(Me)** at B3LYP/6-31G(d, p).

| Center<br>Number | Atomic<br>Number | Atomic<br>Type | Coordinates (Angstroms) |           |           |
|------------------|------------------|----------------|-------------------------|-----------|-----------|
|                  |                  |                | X                       | Y         | Z         |
| 1                | 6                | 0              | -0.710659               | -0.929266 | -0.000205 |
| 2                | 6                | 0              | 0.710668                | -0.929254 | 0.000209  |
| 3                | 6                | 0              | 1.393079                | -2.156493 | 0.000588  |
| 4                | 6                | 0              | 0.709751                | -3.369713 | 0.000354  |
| 5                | 6                | 0              | -0.709693               | -3.369726 | -0.000351 |
| 6                | 6                | 0              | -1.393044               | -2.156519 | -0.000584 |
| 7                | 6                | 0              | -1.293391               | 0.400017  | -0.000191 |
| 8                | 16               | 0              | -0.000014               | 1.613434  | 0.000003  |
| 9                | 6                | 0              | 1.293380                | 0.400036  | 0.000195  |
| 10               | 6                | 0              | 2.605915                | 0.819597  | 0.000127  |
| 11               | 6                | 0              | -2.605928               | 0.819572  | -0.000124 |
| 12               | 16               | 0              | -4.025543               | -0.257431 | 0.000037  |
| 13               | 6                | 0              | -5.135406               | 1.108919  | 0.000020  |
| 14               | 6                | 0              | -4.409230               | 2.345767  | -0.000054 |
| 15               | 6                | 0              | -3.057306               | 2.183488  | -0.000125 |
| 16               | 6                | 0              | 5.135391                | 1.108935  | -0.000021 |
| 17               | 16               | 0              | 4.025525                | -0.257413 | -0.000039 |
| 18               | 6                | 0              | 3.057295                | 2.183511  | 0.000129  |
| 19               | 6                | 0              | 4.409219                | 2.345786  | 0.000056  |
| 20               | 6                | 0              | 6.511742                | 0.952553  | -0.000087 |
| 21               | 6                | 0              | -6.511757               | 0.952541  | 0.000084  |
| 22               | 6                | 0              | 1.479300                | -4.665762 | 0.000821  |
| 23               | 6                | 0              | -1.479217               | -4.665790 | -0.000821 |
| 24               | 6                | 0              | 7.361178                | 2.096432  | -0.000097 |
| 25               | 7                | 0              | 8.033352                | 3.048273  | -0.000063 |
| 26               | 6                | 0              | 7.108472                | -0.339658 | -0.000142 |
| 27               | 7                | 0              | 7.561333                | -1.413674 | -0.000191 |
| 28               | 6                | 0              | -7.361190               | 2.096422  | 0.000095  |
| 29               | 7                | 0              | -8.033363               | 3.048264  | 0.000057  |
| 30               | 6                | 0              | -7.108491               | -0.339668 | 0.000135  |
| 31               | 7                | 0              | -7.561354               | -1.413683 | 0.000185  |
| 32               | 1                | 0              | 2.475092                | -2.185980 | 0.001141  |
| 33               | 1                | 0              | -2.475056               | -2.186030 | -0.001136 |
| 34               | 1                | 0              | -4.919868               | 3.300826  | -0.000050 |
| 35               | 1                | 0              | -2.361039               | 3.014610  | -0.000208 |
| 36               | 1                | 0              | 2.361030                | 3.014636  | 0.000215  |
| 37               | 1                | 0              | 4.919860                | 3.300843  | 0.000053  |
| 38               | 1                | 0              | 1.237838                | -5.273732 | 0.880350  |
| 39               | 1                | 0              | 1.238698                | -5.273878 | -0.878840 |
| 40               | 1                | 0              | 2.556748                | -4.487818 | 0.001330  |
| 41               | 1                | 0              | -1.237752               | -5.273747 | -0.880359 |
| 42               | 1                | 0              | -1.238595               | -5.273910 | 0.878832  |
| 43               | 1                | 0              | -2.556668               | -4.487866 | -0.001318 |

Optimized structure of **BTQ-F(Me)** at B3LYP/6-31G(d, p).

| Center<br>Number | Atomic<br>Number | Atomic<br>Type | Coordinates (Angstroms) |           |          |
|------------------|------------------|----------------|-------------------------|-----------|----------|
|                  |                  |                | X                       | Y         | Z        |
| 1                | 6                | 0              | 0.710292                | -1.264901 | 0.000455 |

|    |    |   |           |           |           |
|----|----|---|-----------|-----------|-----------|
| 2  | 6  | 0 | -0.710222 | -1.265004 | -0.000418 |
| 3  | 6  | 0 | -1.391100 | -2.493209 | -0.001185 |
| 4  | 6  | 0 | -0.709135 | -3.707140 | -0.000686 |
| 5  | 6  | 0 | 0.709624  | -3.707027 | 0.000730  |
| 6  | 6  | 0 | 1.391386  | -2.492984 | 0.001228  |
| 7  | 6  | 0 | 1.288388  | 0.067899  | 0.000451  |
| 8  | 16 | 0 | -0.000129 | 1.285444  | 0.000030  |
| 9  | 6  | 0 | -1.288488 | 0.067733  | -0.000411 |
| 10 | 6  | 0 | -2.610684 | 0.459847  | -0.000335 |
| 11 | 6  | 0 | 2.610568  | 0.460063  | 0.000359  |
| 12 | 16 | 0 | 4.016260  | -0.641065 | -0.000225 |
| 13 | 6  | 0 | 5.174901  | 0.692507  | -0.000056 |
| 14 | 6  | 0 | 4.470885  | 1.931814  | 0.000317  |
| 15 | 6  | 0 | 3.111844  | 1.799893  | 0.000519  |
| 16 | 6  | 0 | -5.175015 | 0.692390  | 0.000026  |
| 17 | 16 | 0 | -4.016422 | -0.641224 | 0.000194  |
| 18 | 6  | 0 | -3.111916 | 1.799690  | -0.000481 |
| 19 | 6  | 0 | -4.470952 | 1.931669  | -0.000307 |
| 20 | 6  | 0 | -1.479384 | -5.002553 | -0.001580 |
| 21 | 6  | 0 | 1.480085  | -5.002314 | 0.001628  |
| 22 | 9  | 0 | 5.090710  | 3.107892  | 0.000475  |
| 23 | 9  | 0 | 2.297843  | 2.855678  | 0.000926  |
| 24 | 9  | 0 | -2.297858 | 2.855432  | -0.000848 |
| 25 | 9  | 0 | -5.090728 | 3.107773  | -0.000456 |
| 26 | 6  | 0 | -6.541643 | 0.478231  | 0.000232  |
| 27 | 6  | 0 | 6.541521  | 0.478297  | -0.000297 |
| 28 | 6  | 0 | -7.488163 | 1.543542  | 0.000181  |
| 29 | 7  | 0 | -8.293456 | 2.384876  | 0.000153  |
| 30 | 6  | 0 | -7.045406 | -0.854687 | 0.000506  |
| 31 | 7  | 0 | -7.412886 | -1.960778 | 0.000737  |
| 32 | 6  | 0 | 7.488078  | 1.543574  | -0.000247 |
| 33 | 7  | 0 | 8.293406  | 2.384876  | -0.000213 |
| 34 | 6  | 0 | 7.045235  | -0.854640 | -0.000607 |
| 35 | 7  | 0 | 7.412682  | -1.960741 | -0.000849 |
| 36 | 1  | 0 | -2.472482 | -2.527679 | -0.002358 |
| 37 | 1  | 0 | 2.472780  | -2.527251 | 0.002410  |
| 38 | 1  | 0 | -1.237430 | -5.610372 | -0.880995 |
| 39 | 1  | 0 | -1.239224 | -5.610537 | 0.878209  |
| 40 | 1  | 0 | -2.556821 | -4.824650 | -0.002658 |
| 41 | 1  | 0 | 1.238225  | -5.610174 | 0.881041  |
| 42 | 1  | 0 | 1.240027  | -5.610338 | -0.878163 |
| 43 | 1  | 0 | 2.557493  | -4.824237 | 0.002710  |

-----  
Optimized structure of **BTQ-6(Me)** at B3LYP/6-31G(d, p).  
-----

| Center<br>Number | Atomic<br>Number | Atomic<br>Type | Coordinates (Angstroms) |           |           |
|------------------|------------------|----------------|-------------------------|-----------|-----------|
|                  |                  |                | X                       | Y         | Z         |
| 1                | 6                | 0              | 6.744390                | -1.167844 | -0.000300 |
| 2                | 6                | 0              | 5.330323                | -1.339137 | -0.000485 |
| 3                | 6                | 0              | 7.161247                | 0.219019  | -0.000034 |
| 4                | 16               | 0              | 5.732728                | 1.262760  | -0.000102 |
| 5                | 6                | 0              | 4.594265                | -0.097743 | -0.000377 |
| 6                | 6                | 0              | 3.235099                | 0.169142  | -0.000425 |
| 7                | 6                | 0              | 8.418140                | 0.797659  | 0.000273  |



|    |    |   |            |           |           |
|----|----|---|------------|-----------|-----------|
| 8  | 16 | 0 | 9.957658   | -0.099346 | 0.000511  |
| 9  | 6  | 0 | 10.896424  | 1.389140  | 0.000833  |
| 10 | 6  | 0 | 10.028341  | 2.525685  | 0.000764  |
| 11 | 6  | 0 | 8.702033   | 2.199874  | 0.000467  |
| 12 | 6  | 0 | 0.672356   | 0.167424  | -0.000462 |
| 13 | 16 | 0 | 1.953010   | -1.061614 | -0.000448 |
| 14 | 6  | 0 | 2.628625   | 1.464720  | -0.000419 |
| 15 | 6  | 0 | 1.260099   | 1.462867  | -0.000446 |
| 16 | 6  | 0 | 12.286015  | 1.395690  | 0.001116  |
| 17 | 6  | 0 | -12.286011 | -1.395707 | 0.001113  |
| 18 | 6  | 0 | -10.028332 | -2.525692 | 0.000761  |
| 19 | 6  | 0 | -8.702025  | -2.199875 | 0.000465  |
| 20 | 16 | 0 | -9.957661  | 0.099339  | 0.000510  |
| 21 | 6  | 0 | -10.896420 | -1.389151 | 0.000831  |
| 22 | 6  | 0 | -2.628625  | -1.464711 | -0.000421 |
| 23 | 6  | 0 | -1.260099  | -1.462858 | -0.000447 |
| 24 | 6  | 0 | -0.672356  | -0.167415 | -0.000462 |
| 25 | 16 | 0 | -1.953010  | 1.061623  | -0.000447 |
| 26 | 6  | 0 | -3.235100  | -0.169133 | -0.000425 |
| 27 | 6  | 0 | -8.418138  | -0.797659 | 0.000271  |
| 28 | 6  | 0 | -7.161247  | -0.219015 | -0.000035 |
| 29 | 16 | 0 | -5.732727  | -1.262754 | -0.000104 |
| 30 | 6  | 0 | -4.594265  | 0.097751  | -0.000378 |
| 31 | 6  | 0 | -6.744392  | 1.167850  | -0.000301 |
| 32 | 6  | 0 | -5.330325  | 1.339144  | -0.000485 |
| 33 | 6  | 0 | 7.571250   | -2.305480 | -0.000429 |
| 34 | 6  | 0 | 4.804400   | -2.644392 | -0.000790 |
| 35 | 6  | 0 | 7.041968   | -3.591033 | -0.000714 |
| 36 | 6  | 0 | 5.630907   | -3.762219 | -0.000898 |
| 37 | 6  | 0 | -4.804404  | 2.644399  | -0.000790 |
| 38 | 6  | 0 | -5.630912  | 3.762226  | -0.000897 |
| 39 | 6  | 0 | -7.041972  | 3.591038  | -0.000713 |
| 40 | 6  | 0 | -7.571253  | 2.305484  | -0.000429 |
| 41 | 6  | 0 | 5.027552   | -5.144183 | -0.001219 |
| 42 | 6  | 0 | 7.961392   | -4.786395 | -0.000845 |
| 43 | 6  | 0 | -5.027558  | 5.144191  | -0.001217 |
| 44 | 6  | 0 | -7.961398  | 4.786400  | -0.000844 |
| 45 | 6  | 0 | 12.992232  | 2.631619  | 0.001377  |
| 46 | 7  | 0 | 13.544974  | 3.658116  | 0.001576  |
| 47 | 6  | 0 | 13.030671  | 0.184334  | 0.001150  |
| 48 | 7  | 0 | 13.607989  | -0.828934 | 0.001171  |
| 49 | 6  | 0 | -12.992223 | -2.631640 | 0.001372  |
| 50 | 7  | 0 | -13.544960 | -3.658139 | 0.001594  |
| 51 | 6  | 0 | -13.030672 | -0.184355 | 0.001148  |
| 52 | 7  | 0 | -13.607995 | 0.828911  | 0.001169  |
| 53 | 1  | 0 | 10.418851  | 3.535753  | 0.000936  |
| 54 | 1  | 0 | 7.910931   | 2.941487  | 0.000375  |
| 55 | 1  | 0 | 3.221601   | 2.371859  | -0.000412 |
| 56 | 1  | 0 | 0.659605   | 2.365408  | -0.000453 |
| 57 | 1  | 0 | -10.418837 | -3.535762 | 0.000933  |
| 58 | 1  | 0 | -7.910920  | -2.941484 | 0.000372  |
| 59 | 1  | 0 | -3.221602  | -2.371850 | -0.000414 |
| 60 | 1  | 0 | -0.659605  | -2.365399 | -0.000454 |
| 61 | 1  | 0 | 8.648809   | -2.201514 | -0.000336 |
| 62 | 1  | 0 | 3.733479   | -2.803288 | -0.000984 |

|    |   |   |           |           |           |
|----|---|---|-----------|-----------|-----------|
| 63 | 1 | 0 | -3.733484 | 2.803297  | -0.000983 |
| 64 | 1 | 0 | -8.648812 | 2.201518  | -0.000336 |
| 65 | 1 | 0 | 5.341664  | -5.718438 | -0.880570 |
| 66 | 1 | 0 | 5.341363  | -5.718707 | 0.878067  |
| 67 | 1 | 0 | 3.936093  | -5.099882 | -0.001396 |
| 68 | 1 | 0 | 7.796302  | -5.419575 | 0.878735  |
| 69 | 1 | 0 | 7.796525  | -5.419211 | -0.880729 |
| 70 | 1 | 0 | 9.009645  | -4.479944 | -0.000649 |
| 71 | 1 | 0 | -5.341674 | 5.718447  | -0.880566 |
| 72 | 1 | 0 | -5.341367 | 5.718713  | 0.878071  |
| 73 | 1 | 0 | -3.936100 | 5.099890  | -0.001397 |
| 74 | 1 | 0 | -7.796306 | 5.419581  | 0.878734  |
| 75 | 1 | 0 | -7.796534 | 5.419213  | -0.880730 |
| 76 | 1 | 0 | -9.009650 | 4.479947  | -0.000644 |

Optimized structure of **TQ(Me)** at B3LYP/6-31G(d, p).

| Center<br>Number | Atomic<br>Number | Atomic<br>Type | Coordinates (Angstroms) |           |           |
|------------------|------------------|----------------|-------------------------|-----------|-----------|
|                  |                  |                | X                       | Y         | Z         |
| 1                | 6                | 0              | 6.505729                | -0.375527 | 0.000033  |
| 2                | 6                | 0              | -0.692708               | 1.466632  | 0.000078  |
| 3                | 6                | 0              | 0.692491                | 1.466767  | -0.000167 |
| 4                | 6                | 0              | -1.274003               | 0.146056  | 0.000073  |
| 5                | 16               | 0              | 0.000117                | -1.080914 | -0.000077 |
| 6                | 6                | 0              | 1.274028                | 0.146272  | -0.000178 |
| 7                | 6                | 0              | 2.598819                | -0.259257 | 0.000081  |
| 8                | 6                | 0              | -2.598770               | -0.259519 | -0.000158 |
| 9                | 16               | 0              | -4.014150               | 0.824757  | -0.000057 |
| 10               | 6                | 0              | -5.128142               | -0.536825 | -0.000065 |
| 11               | 6                | 0              | -4.409344               | -1.775886 | -0.000229 |
| 12               | 6                | 0              | -3.055114               | -1.618984 | -0.000283 |
| 13               | 6                | 0              | 5.128196                | -0.536755 | 0.000085  |
| 14               | 16               | 0              | 4.014294                | 0.824901  | 0.000073  |
| 15               | 6                | 0              | 3.055087                | -1.618747 | 0.000180  |
| 16               | 6                | 0              | 4.409304                | -1.775758 | 0.000177  |
| 17               | 6                | 0              | -6.505662               | -0.375496 | 0.000052  |
| 18               | 6                | 0              | -1.552299               | 2.699845  | 0.000224  |
| 19               | 6                | 0              | 1.551747                | 2.700211  | -0.000304 |
| 20               | 6                | 0              | -7.358060               | -1.516588 | 0.000030  |
| 21               | 7                | 0              | -8.032415               | -2.467043 | 0.000112  |
| 22               | 6                | 0              | -7.099804               | 0.917408  | 0.000191  |
| 23               | 7                | 0              | -7.552939               | 1.991417  | 0.000256  |
| 24               | 6                | 0              | 7.358046                | -1.516680 | 0.000047  |
| 25               | 7                | 0              | 8.032325                | -2.467189 | 0.000070  |
| 26               | 6                | 0              | 7.099964                | 0.917334  | -0.000035 |
| 27               | 7                | 0              | 7.553166                | 1.991315  | -0.000087 |
| 28               | 1                | 0              | -4.923657               | -2.729025 | -0.000342 |
| 29               | 1                | 0              | -2.362870               | -2.453371 | -0.000490 |
| 30               | 1                | 0              | 2.362777                | -2.453080 | 0.000329  |
| 31               | 1                | 0              | 4.923542                | -2.728939 | 0.000277  |
| 32               | 1                | 0              | -0.957716               | 3.612254  | 0.000612  |
| 33               | 1                | 0              | -2.199218               | 2.733271  | -0.882906 |
| 34               | 1                | 0              | -2.199609               | 2.732816  | 0.883072  |

|    |   |   |          |          |           |
|----|---|---|----------|----------|-----------|
| 35 | 1 | 0 | 2.199091 | 2.733340 | -0.883117 |
| 36 | 1 | 0 | 0.956910 | 3.612457 | -0.000762 |
| 37 | 1 | 0 | 2.198588 | 2.733863 | 0.882871  |

Optimized structure of **TQ-6(Me)** at B3LYP/6-31G(d, p).

| Center<br>Number | Atomic<br>Number | Atomic<br>Type | Coordinates (Angstroms) |           |           |
|------------------|------------------|----------------|-------------------------|-----------|-----------|
|                  |                  |                | X                       | Y         | Z         |
| 1                | 6                | 0              | -6.625669               | -1.597949 | 0.000541  |
| 2                | 6                | 0              | -5.229574               | -1.662036 | 0.000701  |
| 3                | 6                | 0              | -7.136385               | -0.262289 | 0.000198  |
| 4                | 16               | 0              | -5.805602               | 0.898051  | 0.000023  |
| 5                | 6                | 0              | -4.594822               | -0.385277 | 0.000499  |
| 6                | 6                | 0              | -3.237852               | -0.028743 | 0.000604  |
| 7                | 6                | 0              | -8.448675               | 0.218218  | -0.000018 |
| 8                | 16               | 0              | -9.911094               | -0.796261 | -0.000470 |
| 9                | 6                | 0              | -10.962606              | 0.613580  | -0.000671 |
| 10               | 6                | 0              | -10.189785              | 1.810642  | -0.000386 |
| 11               | 6                | 0              | -8.837041               | 1.587939  | -0.000039 |
| 12               | 6                | 0              | -0.688512               | 0.129761  | 0.000618  |
| 13               | 16               | 0              | -1.881589               | -1.172412 | 0.000578  |
| 14               | 6                | 0              | -2.722604               | 1.292243  | 0.000642  |
| 15               | 6                | 0              | -1.346801               | 1.378129  | 0.000650  |
| 16               | 6                | 0              | -4.434307               | -2.938701 | 0.001101  |
| 17               | 6                | 0              | -7.538555               | -2.793539 | 0.000750  |
| 18               | 6                | 0              | 4.434259                | 2.938645  | 0.001105  |
| 19               | 6                | 0              | 7.538527                | 2.793526  | 0.000756  |
| 20               | 6                | 0              | 10.189818               | -1.810603 | -0.000381 |
| 21               | 6                | 0              | 8.837071                | -1.587925 | -0.000034 |
| 22               | 16               | 0              | 9.911081                | 0.796294  | -0.000467 |
| 23               | 6                | 0              | 10.962618               | -0.613527 | -0.000668 |
| 24               | 6                | 0              | 2.722607                | -1.292299 | 0.000643  |
| 25               | 6                | 0              | 1.346803                | -1.378184 | 0.000650  |
| 26               | 6                | 0              | 0.688514                | -0.129816 | 0.000618  |
| 27               | 16               | 0              | 1.881591                | 1.172358  | 0.000577  |
| 28               | 6                | 0              | 3.237853                | 0.028688  | 0.000604  |
| 29               | 6                | 0              | 8.448680                | -0.218211 | -0.000015 |
| 30               | 6                | 0              | 7.136383                | 0.262275  | 0.000199  |
| 31               | 16               | 0              | 5.805617                | -0.898084 | 0.000020  |
| 32               | 6                | 0              | 4.594821                | 0.385229  | 0.000499  |
| 33               | 6                | 0              | 6.625650                | 1.597928  | 0.000544  |
| 34               | 6                | 0              | 5.229554                | 1.661996  | 0.000703  |
| 35               | 6                | 0              | 12.352920               | -0.508316 | -0.001044 |
| 36               | 6                | 0              | -12.352910              | 0.508394  | -0.001047 |
| 37               | 6                | 0              | 13.153524               | -1.683651 | -0.001218 |
| 38               | 7                | 0              | 13.784508               | -2.664489 | -0.001329 |
| 39               | 6                | 0              | 12.999621               | 0.756510  | -0.001268 |
| 40               | 7                | 0              | 13.497967               | 1.811333  | -0.001456 |
| 41               | 6                | 0              | -13.153493              | 1.683743  | -0.001221 |
| 42               | 7                | 0              | -13.784458              | 2.664593  | -0.001325 |
| 43               | 6                | 0              | -12.999634              | -0.756420 | -0.001269 |
| 44               | 7                | 0              | -13.498001              | -1.811234 | -0.001434 |
| 45               | 1                | 0              | -10.656377              | 2.787937  | -0.000421 |

|    |   |   |           |           |           |
|----|---|---|-----------|-----------|-----------|
| 46 | 1 | 0 | -8.107119 | 2.389803  | 0.000250  |
| 47 | 1 | 0 | -3.369881 | 2.161396  | 0.000700  |
| 48 | 1 | 0 | -0.806511 | 2.317933  | 0.000709  |
| 49 | 1 | 0 | -3.789224 | -3.005086 | 0.884074  |
| 50 | 1 | 0 | -5.075445 | -3.819252 | 0.001507  |
| 51 | 1 | 0 | -3.789447 | -3.005778 | -0.881989 |
| 52 | 1 | 0 | -6.984714 | -3.731844 | 0.001416  |
| 53 | 1 | 0 | -8.188118 | -2.799897 | 0.882693  |
| 54 | 1 | 0 | -8.187441 | -2.800727 | -0.881691 |
| 55 | 1 | 0 | 3.789173  | 3.005013  | 0.884078  |
| 56 | 1 | 0 | 5.075375  | 3.819210  | 0.001512  |
| 57 | 1 | 0 | 3.789395  | 3.005706  | -0.881984 |
| 58 | 1 | 0 | 6.984682  | 3.731828  | 0.001423  |
| 59 | 1 | 0 | 8.188090  | 2.799887  | 0.882699  |
| 60 | 1 | 0 | 8.187415  | 2.800719  | -0.881684 |
| 61 | 1 | 0 | 10.656429 | -2.787891 | -0.000415 |
| 62 | 1 | 0 | 8.107163  | -2.389803 | 0.000256  |
| 63 | 1 | 0 | 3.369882  | -2.161453 | 0.000702  |
| 64 | 1 | 0 | 0.806512  | -2.317988 | 0.000710  |

---

#### Reference

- 1) S. Li, H. Qu, L. Zhou, K.-i. Kanno, Q. Guo, B. Shen, T. Takahashi, *Org. Lett.*, 2009, **11**, 3318–3321.
- 2) Y. Sakamoto, S. Komatsu, T. Suzuki, *J. Am. Chem. Soc.*, 2001, **123**, 4643–4644.
